# Supplementary material
Source: bioRxiv or medRxiv preprint supplement (https://medrxiv.org/highwire/filestream/69759/field_highwire_adjunct_files/0/19010124-1.pdf)

**Supplemental Table 1: Accuracy for Negative Samples. Real Time PCR Compared to Reference Method(s)**

| Sample # | Specimen | NPM1 Type A Mutant RT-PCR Result | NPM1 Type A Mutant RT-PCR Value (% NCN, NPM1 Type A Mutant/ ABL) [Copies NPM1 MutA, Copies ABL1; Copies NPM1 MutA, Copies ABL1 ] | NGS Reference Result | ddPCR Reference Result (% NCN, NPM1 Type A Mutant/ ABL1 ) | Pathol. Diagnosis |
|----------|----------|----------------------------------|----------------------------------------------------------------------------------------------------------------------------------|----------------------|-----------------------------------------------------------|-------------------|
| N15      | BM       | Negative                         | Undetectable [0,19000; 0,22300]                                                                                                  | Negative             | Negative: 0.005                                           | AML               |
| N17      | BM       | Negative                         | Undetectable [0,26400; 0,26800]                                                                                                  | Negative             | Negative: 0.003                                           | AML               |
| N20      | PB       | Negative                         | 0.00 [0.009,41000 ; 0,44700]                                                                                                     | Negative             | Negative: 0.001                                           | AML               |
| N21      | BM       | Negative                         | Undetectable [0,66500; 0,66000]                                                                                                  | Negative             | Negative: 0.000                                           | AML               |
| N23      | BM       | Negative                         | Undetectable [0,31400 ; 0,33400]                                                                                                 | Negative             | Negative: 0.003                                           | AML               |
| N25      | PB       | Negative                         | Undetectable [0, 74500; 0,79800]                                                                                                 | Negative             | Negative: 0.000                                           | AML               |
| N32      | BM       | Negative                         | Undetectable [0, 9360; 0,8920]                                                                                                   | Negative             | Negative: 0.000                                           | AML               |
| N33      | BM       | Negative                         | Undetectable [0, 40600; 0,45000]                                                                                                 | Negative             | Negative: 0.005                                           | AML               |
| N34      | PB       | Negative                         | Undetectable [0, 54800; 0,50500]                                                                                                 | Negative             | Negative: 0.004                                           | AML               |
| N35      | BM       | Negative                         | Undetectable [0, 11700; 0,12000]                                                                                                 | Negative             | Negative: 0.000                                           | AML               |

NOTES: Copies of NPM MUTA and ABL are shown for both duplicates in the RT-PCR assay.

%NCN = %Normalized Copy Number = (NPM1 Mutant Type A Copies/ ABL Copies)\*100

**Supplemental Table 2: Intra-Run Reproducibility**

| Sample #               | %,<br>NCN: | Copy Number:<br>[NPM1 MutA, ABL] | %,<br>NCN: | Copy Number:<br>[NPM1 MutA, ABL] | %, NCN | Copy Number:<br>[NPM1 MutA, ABL] | %NCN<br>Mean | %NCN<br>SD | <u>Max Log<br/>Fold<br/>Change</u> |
|------------------------|------------|----------------------------------|------------|----------------------------------|--------|----------------------------------|--------------|------------|------------------------------------|
| N16                    | ND         | [0,54200 ]                       | ND         | [ 0,53000 ]                      | ND     | [ 0,39200 ]                      | 0            | 0          | /                                  |
| N21                    | ND         | [0,55400 ]                       | ND         | [ 0,59000 ]                      | ND     | [ 0,56500 ]                      | 0            | 0          | /                                  |
| N22                    | ND         | [0,53400 ]                       | ND         | [ 0,55500 ]                      | ND     | [ 0,43200 ]                      | 0            | 0          | /                                  |
| P1, High+              | 496.51     | [139000,27900 ]                  | 566.75     | [ 151000,26700 ]                 | 745.57 | [ 157000;21100 ]                 | 602.94       | 128.41     | 0.18                               |
| P11, High+             | 659.38     | [520000,78900 ]                  | 776.07     | [588000,75800]                   | 871.57 | [ 562000;64500 ]                 | 769.01       | 106.27     | 0.12                               |
| P13, High+             | 691.32     | [36800,5320 ]                    | 617.79     | [ 36900,5970]                    | 695.95 | [ 36800;5290 ]                   | 668.35       | 43.85      | 0.05                               |
| P1, Low+               | 0.47       | [26,5880]                        | 0.33       | [18,5740]                        | 0.14   | [8,5610]                         | 0.31         | 0.17       | 0.53                               |
| P11, Low+              | 0.098      | [38,38800]                       | 0.13       | [49,38000]                       | 0.095  | [34,36300]                       | 0.11         | 0.02       | 0.14                               |
| P16, Low+              | 0.15       | [100,67700]                      | 0.23       | [137,59000]                      | 0.22   | [156,70200]                      | 0.20         | 0.04       | 0.19                               |
| Pos Cell<br>Line, Low+ | 0.15       | [225,150000]                     | 0.16       | [203,123000]                     | 0.17   | [206,122000]                     | 0.16         | 0.01       | 0.05                               |

NOTES: %NCN = %Normalized Copy Number = (NPM1 Mutant Type A Copies/ ABL Copies)\*100

| <b>Supplemental Table 3: Analytic Sensitivity. Cell Lines.</b> |                                                |                              |                                          |                        |              |
|----------------------------------------------------------------|------------------------------------------------|------------------------------|------------------------------------------|------------------------|--------------|
| <b>Sample; RNA Dilution<br/>(% Pos Control RNA)</b>            | <b>NPM Type A Mutant,<br/>Number of Copies</b> | <b>ABL, Number of Copies</b> | <b>% NCN,<br/>NPM1 Type A Mutant/ABL</b> | <b>Mean,<br/>% NCN</b> | <b>SD</b>    |
| <b>Cell Lines Dilution<br/>(% Pos Control RNA)</b>             |                                                |                              |                                          |                        |              |
| OCI-AML3_100%                                                  | 449078.875                                     | 74524.29                     | 602.594                                  | 603.331                | 1.042        |
| OCI-AML3_100%                                                  | 453850.406                                     | 75132.38                     | 604.068                                  |                        |              |
| OCI-AML3+MV411_10%                                             | 31229.891                                      | 48039.60                     | 65.009                                   | 57.588                 | 10.495       |
| OCI-AML3+MV411_10%                                             | 26652.297                                      | 53127.45                     | 50.167                                   |                        |              |
| OCI-AML3+MV411_1%                                              | 3235.177                                       | 46716.25                     | 6.925                                    | 6.738                  | 0.264        |
| OCI-AML3+MV411_1%                                              | 3376.028                                       | 51527.98                     | 6.552                                    |                        |              |
| OCI-AML3+MV411_10-1%                                           | 330.779                                        | 47363.50                     | 0.698                                    | 0.671                  | 0.039        |
| OCI-AML3+MV411_10-1%                                           | 322.527                                        | 50119.39                     | 0.644                                    |                        |              |
| OCI-AML3+MV411_10-2%                                           | 32.126                                         | 56495.57                     | 0.057                                    | 0.071                  | 0.020        |
| OCI-AML3+MV411_10-2%                                           | 43.579                                         | 51327.15                     | 0.085                                    |                        |              |
| OCI-AML3+MV411_10-3%                                           | <b>3.231</b>                                   | <b>54812.52</b>              | <b>0.006</b>                             | <b>0.006</b>           | <b>0.000</b> |
| OCI-AML3+MV411_10-3%                                           | <b>3.091</b>                                   | <b>55290.85</b>              | <b>0.006</b>                             |                        |              |
| OCI-AML3+MV411_10-4%                                           | 1.817                                          | 68993.86                     | 0.003                                    | 0.002                  | 0.002        |
| OCI-AML3+MV411_10-4%                                           | 0.366                                          | 73434.43                     | 0.000                                    |                        |              |
| OCI-AML3+MV411_10-5%                                           | 0.009                                          | 79998.87                     | 0.000                                    | 0.000                  | 0.000        |
| OCI-AML3+MV411_10-5%                                           | 0.000                                          | 74978.66                     | 0.000                                    |                        |              |
| MV-4-11                                                        | 0.001                                          | 70750.01                     | 0.000                                    | 0.000                  | 0.000        |
| MV-4-11                                                        | 0.000                                          | 69508.93                     | 0.000                                    |                        |              |
|                                                                |                                                |                              |                                          |                        |              |

# NPM1 MutA Standard Curves, n=19

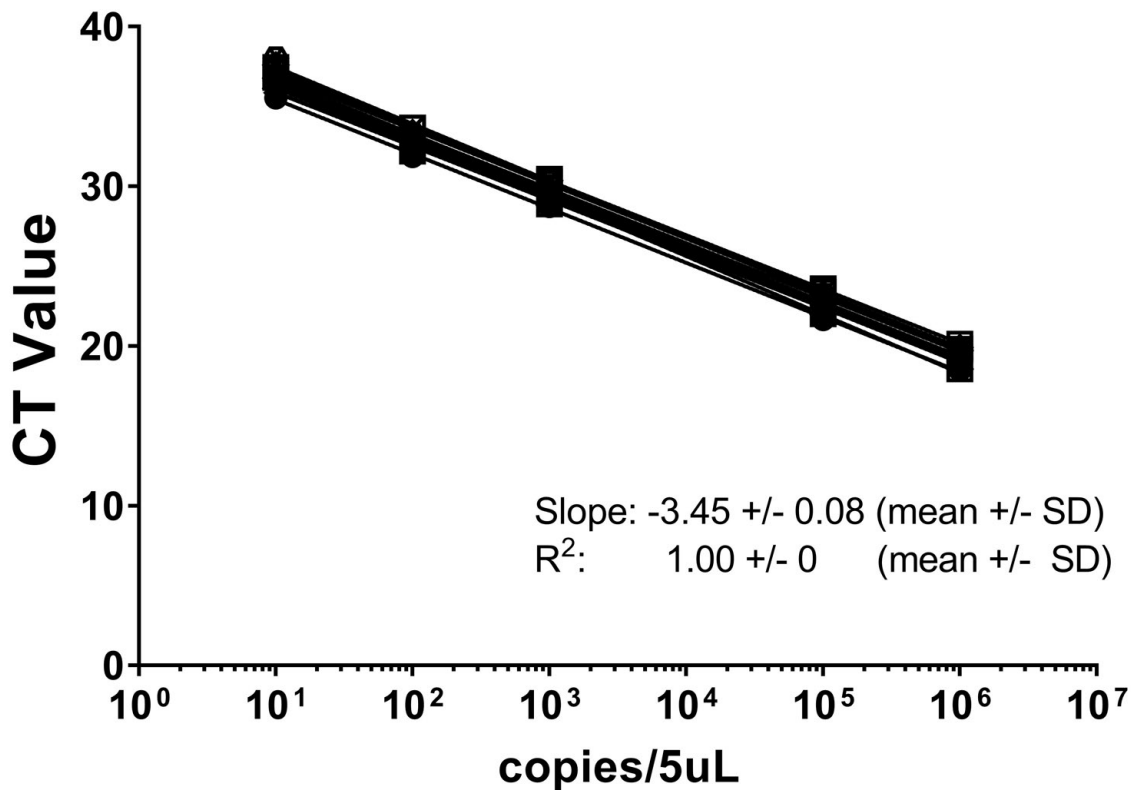

# ABL Standard Curves, n=27

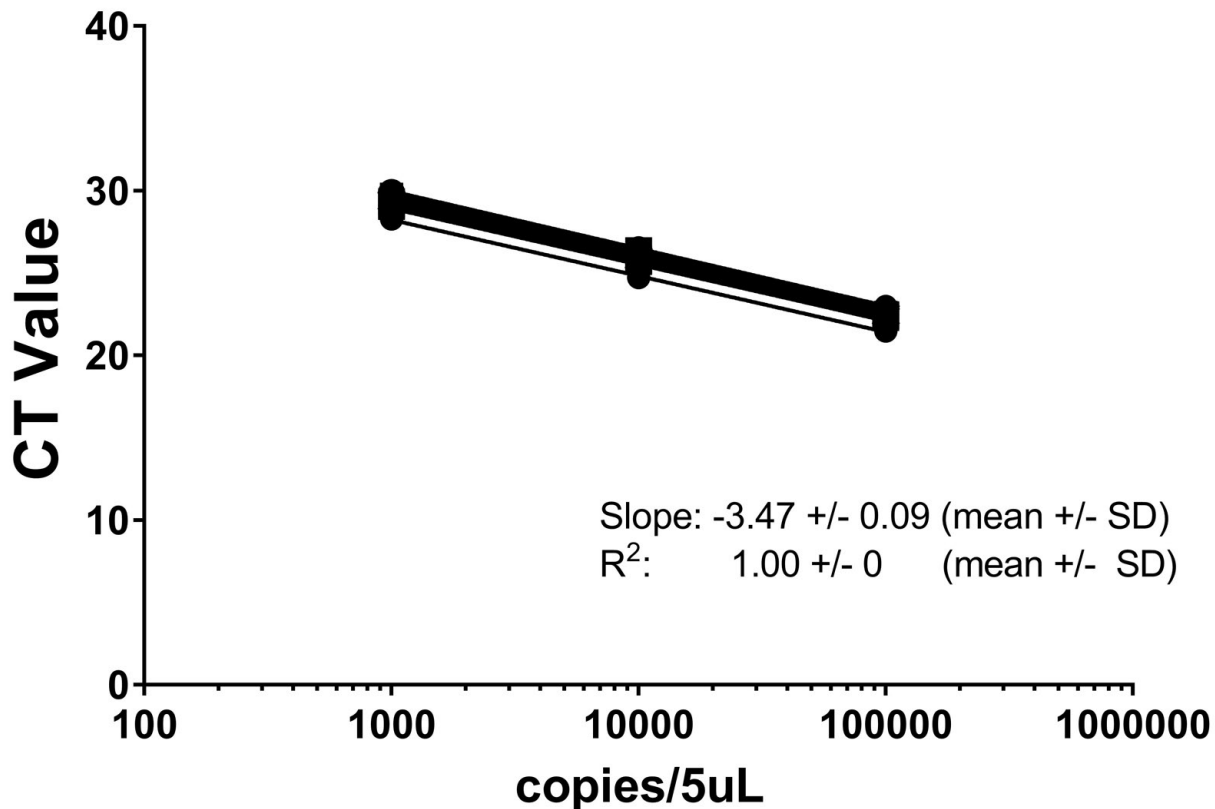

Supplement: Supplementary file [file 19010124-1.pdf]
